# Supplementary material
Source: HighWire-hosted journal article supplement (https://erj.ersjournals.com/content/54/3/1801580)
Supplement: inline-supplementary-material-1 [file inline-supplementary-material-1.pdf]

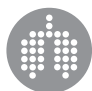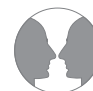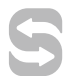

SHAREABLE PDF

# Cumulative effect of smoking on disease burden and multimorbidity in adult-onset asthma

Minna Tommola <sup>1</sup>, Pinja Ilmarinen<sup>1</sup>, Leena E. Tuomisto <sup>1</sup>, Lauri Lehtimäki <sup>2,3</sup>, Onni Niemelä<sup>3,4</sup>, Pentti Nieminen<sup>5</sup> and Hannu Kankaanranta <sup>1,3</sup>

**Affiliations:** <sup>1</sup>Dept of Respiratory Medicine, Seinäjoki Central Hospital, Seinäjoki, Finland. <sup>2</sup>Allergy Centre, Tampere University Hospital, Tampere, Finland. <sup>3</sup>Faculty of Medicine and Health Technology, University of Tampere, Tampere, Finland. <sup>4</sup>Dept of Laboratory Medicine and Medical Research Unit, Seinäjoki Central Hospital, Seinäjoki, Finland. <sup>5</sup>Medical Informatics and Statistics Research Group, University of Oulu, Oulu, Finland.

**Correspondence:** Minna Tommola, Dept of Respiratory Medicine, Seinäjoki Central Hospital, FIN-60220 Seinäjoki, Finland. E-mail: minna.tommola@ksshp.fi

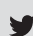

@ERSpublications

**Disease burden and multimorbidity in adult-onset asthma increase dose dependently with smoked pack-years** <http://bit.ly/311627j>

**Cite this article as:** Tommola M, Ilmarinen P, Tuomisto LE, *et al.* Cumulative effect of smoking on disease burden and multimorbidity in adult-onset asthma. *Eur Respir J* 2019; 54: 1801580 [<https://doi.org/10.1183/13993003.01580-2018>].

This single-page version can be shared freely online.

## To the Editor:

Smokers and patients with heavy smoking history have usually been excluded from clinical studies of asthma. Thus, little is known about the impact of lifelong, cumulative tobacco exposure on asthma [1, 2]. The effect of smoking status (never-, ex- or current smoker) on disease burden of asthma has been more commonly recognised, but the impact of smoking history in pack-years has rarely been evaluated [3–6]. The impact of smoked pack-years has been previously reported only by few studies, showing adverse effects on lung function and asthma control [5, 7–10], whereas no significant differences in healthcare use, asthma-related questionnaires or medication use were reported among ex-smokers with severe asthma when patients were categorised based on smoked pack-years [4]. Assessment of pack-years is an easy and usable tool in clinical work, and the intensity of smoking has been proposed to be an even more important factor than plain smoking status [5]. Thus, our aim was to evaluate the impact of cumulative smoking history, *i.e.* pack-years, on hospitalisations, comorbidities and symptoms in adult-onset asthma, as a part of the Seinäjoki Adult Asthma Study (SAAS).
